# Supplementary material
Source: PubMed Central journal article supplement (PMC3104075)
Supplement: NIHMS285587-supplement-supplement_1.pdf [file NIHMS285587-supplement-supplement_1.pdf]

Appendix 1.

**Supplementary Table 1:** PCR primer sequences used in PCR studies

| Primer name                               | Primer Sequence (5' - 3')                   |
|-------------------------------------------|---------------------------------------------|
| Standard PCR Primers                      |                                             |
| <i>p53</i> Exon 4 F                       | GTA AGG ACA AGG GTT GGG C                   |
| <i>p53</i> Exon 4 R                       | GGA ATC CCA AAG TTC CAA AC                  |
| <i>p53</i> Exon 5 F                       | TTT CTT TGC TGC CGT CTT CC                  |
| <i>p53</i> Exon 5 R                       | GTG AGG AAT CAG AGG CCT G                   |
| <i>p53</i> Exon 6 F                       | TGA GCG CTG CTC AGA TAG C                   |
| <i>p53</i> Exon 6 R                       | ATA AGC AGC AGG AGA AAG CC                  |
| <i>p53</i> Exon 7 F                       | CAC AGG TCT CCC CAA GGC                     |
| <i>p53</i> Exon 7 R                       | AGA AAT CGG TAA GAG GTG G                   |
| <i>p53</i> Exon 8 F                       | GGT TGG GAG TAG ATG GAG C                   |
| <i>p53</i> Exon 8 R                       | TAG GAA AGA GGC AAG GAA AG                  |
| <i>K-ras</i> Exon 2 F                     | ACCTTATGTGTGACATGTTCTA                      |
| <i>K-ras</i> Exon 2 R                     | GAATGGTCCTGCACCAGTA                         |
| <i>K-ras</i> Exon 3 F                     | GCACTGTAATAATCCAGACTGTG                     |
| <i>K-ras</i> Exon 3 R                     | AATTACTCCTTAATGTCAGCTT                      |
| PNA Primers                               |                                             |
| <i>K-ras</i> F                            | ATT AAC CTT ATG TGT GAC ATG TTC TA          |
| <i>K-ras</i> R                            | CAA GAT TTA CCT CTA TTG TTG GAT C           |
| PNA Clamp probe (codon 12 & 13)           | CCT ACG CCA CCA GCT CC                      |
| PAP-A Primers                             |                                             |
| <i>p53</i> (c.445_446InsT) F              | TGC CCT GTG CAG CTG TGG GTT GAT TTC/ddC/    |
| <i>p53</i> (c.445_446InsT) R              | CGC CTC ACA ACC TCC GTC ATG TGC TGT GA/ddC/ |
| <i>p53</i> (c.524G>A,R175H), F            | ACA GCA CAT GAC GGA GGT TGT GAG GC/ddA/     |
| <i>p53</i> (c.524G>A,R175H), R            | GCC AGA CCT AAG AGC AAT CAG TGA GGA AT/ddC/ |
| <i>p53</i> (c.638G>T, R213L), F           | GGA GTA TTT GGA TGA CAG AAA CAC TTT TC/ddT/ |
| <i>p53</i> (c.638G>T, R213L), R           | GCT CAT AGG GCA CCA CCA CAC TAT GT/ddA/     |
| <i>p53</i> (Intron8,+1G>A, Splice Site) F | CCC CAG GGA GCA CTA AGC GAG /ddA/           |
| <i>p53</i> (Intron8,+1G>A, Splice Site) R | GGT GAT AAA AGT GAA TCT GAG GCA TAA /ddC/   |
| <i>p53</i> (c.753_762del CTCACCATC), F    | TGA ACC GGA GGC CCA TCA TCA CA/ddcC/        |
| <i>p53</i> (c.753_762del CTCACCATC), R    | GTC AGA GGC AAG CAG AGG /ddC/               |
| <i>p53</i> (c.526T>C, C176R), F           | ACA GCA CAT GAC GGA GGT TGT GAG GCG C/ddC/  |
| <i>p53</i> (c.526T>C, C176R), R           | AAC CAG CCC TGT CGT CTC TCC AG/ddC/         |

F, forward; R, reverse; 5', 5 prime; 3', 3 prime; dd, dideoxynucleotide.
